# Supplementary material for: SARS-CoV-2-specific humoral and cellular immunity assessment in Peruvian vaccinated population: a cross-sectional study
Source: PeerJ. 2025 Jul 15;13:e19651. doi: 10.7717/peerj.19651 (PMC12273700; doi:10.7717/peerj.19651)
Supplement: Supplemental Information 1 [file peerj-13-19651-s001.xlsx]

## Sheet: Hoja1
Code	Age	Sex	Chronic Disease	Immunosuppression History	Fever Episode (Last 3 Months)	SARS-CoV-2 infection (previous to sample collection)	COVID symptomatology	COVID episodes	COVID Clinical Status	Months since last COVID	COVID before first dose	Number of doses	Vaccination regimen	First 2 doses	Inclusion SINOPHARM	Inclusion PFIZER	Inclusion ASTRAZENECA	Inclusion ModernaTX	months since last dose	vaccination within the last 6 months	IgG anti-spike_ratio	log10_IgG_anti-spike	RQ_Wuhan	Log_2_RQ_Wuhan	RQ_Omicron	Log_2_RQ_Wuhan
PRC-001	30	Female	Yes	No	No	Yes	Symptomatic	1	Mild/moderate	20	Yes	3	Heterologous	BBIBP-CorV	Yes	Yes	No	No	21	>6	11.1496	1.04726	4.45	2.15381	455.09	8.83001
PRC-002	30	Male	Yes	No	No	Yes	Symptomatic	2	Severe	13	Yes	5	Heterologous	BBIBP-CorV	Yes	Yes	No	No	4	<6	12.8504	1.10892	28.05	4.80993	326.29	8.35001
PRC-003	35	Female	No	No	Yes	Yes	Symptomatic	1	Mild/moderate	20	No	3	Heterologous	BBIBP-CorV	Yes	Yes	No	No	21	>6	10.2047	1.0088	277.24	8.11499	481.04	8.91001
PRC-004	24	Female	No	No	No	Yes	Symptomatic	2	Mild/moderate	10	No	4	Heterologous	BNT162b2	No	Yes	No	Yes	0	<6	15.5118	1.19066	51.8	5.69488	596.34	9.21999
PRC-006	37	Female	Yes	No	No	Yes	Symptomatic	2	Mild/moderate	14	No	5	Heterologous	BBIBP-CorV	Yes	Yes	No	Yes	2	<6	13.2126	1.12099	5.46	2.4489	26.54	4.7301
PRC-007	26	Male	No	No	No	Yes	Symptomatic	1	Mild/moderate	3	No	3	Heterologous	BBIBP-CorV	Yes	Yes	No	No	21	>6	12.7874	1.10678	9.51	3.24945	83.29	6.38007
PRC-008	50	Male	No	No	No	Yes	Symptomatic	1	Mild/moderate	23	No	5	Heterologous	BBIBP-CorV	Yes	Yes	No	No	4	<6	10.9213	1.03827	11952.3	13.545	539028	19.04
PRC-011	32	Female	No	No	No	Yes	Symptomatic	2	Mild/moderate	20	Yes	3	Homologous	BBIBP-CorV	Yes	No	No	No	19	>6	8.6063	0.934816	1.57	0.650765	1930.82	10.915
PRC-012	48	Female	Yes	No	No	Yes	Symptomatic	1	Mild/moderate	13	No	4	Heterologous	BBIBP-CorV	Yes	Yes	No	No	6	<6	14.2598	1.15411	0.58	-0.785875	1.89	0.918386
PRC-013	30	Female	No	No	Yes	Yes	Symptomatic	3	Severe	20	Yes	5	Heterologous	BBIBP-CorV	Yes	Yes	Yes	Yes	6	<6	13.2677	1.1228	2.19	1.13093	5.94	2.57046
PRC-014	36	Female	No	No	No	Yes	Symptomatic	2	Mild/moderate	20	No	3	Heterologous	BBIBP-CorV	Yes	Yes	No	No	17	>6	10.4803	1.02037	0.3	-1.73697	2.72	1.44361
PRC-015	26	Female	No	No	Yes	No	criteria_not_met	criteria_not_met	criteria_not_met	criteria_not_met	No	3	Homologous	BNT162b2	No	Yes	No	No	18	>6	12.3228	1.09071	13.83	3.78973	45.41	5.50494
PRC-016	41	Male	No	No	Yes	Yes	Symptomatic	1	Mild/moderate	23	No	5	Heterologous	BBIBP-CorV	Yes	Yes	No	Yes	6	<6	12.5827	1.09977	23.26	4.53978	2320.15	11.18
PRC-017	28	Female	No	No	Yes	Yes	Symptomatic	1	Mild/moderate	21	No	3	Heterologous	BBIBP-CorV	Yes	No	Yes	No	18	>6	8.90551	0.949659	1438.15	10.49	1752.26	10.775
PRC-018	61	Male	Yes	No	No	Yes	Asymptomatic	1	criteria_not_met	35	Yes	4	Heterologous	BNT162b2	No	Yes	No	Yes	15	>6	12.252	1.08821	281.11	8.13499	535.6	9.06501
PRC-019	56	Male	Yes	Yes	No	Yes	Symptomatic	1	Mild/moderate	10	No	3	Heterologous	AZD1222	No	No	Yes	Yes	not precise	>6	14.2677	1.15435	33.13	5.05007	3.79324e+06	21.855
PRC-022	34	Female	No	No	No	Yes	Symptomatic	2	Mild/moderate	14	No	3	Homologous	BNT162b2	No	Yes	No	No	15	>6	8.69291	0.939165	28.44	4.82985	59269.4	15.855
PRC-023	25	Female	No	No	No	Yes	Symptomatic	2	Mild/moderate	13	Yes	3	Homologous	BBIBP-CorV	Yes	No	No	No	15	>6	6.1811	0.791066	3.56	1.83188	5.56	2.47508
PRC-024	42	Female	No	No	No	Yes	Symptomatic	2	Mild/moderate	3	No	3	Heterologous	criteria_not_met	Yes	Yes	No	No	16	>6	9.85827	0.993801	7.78	2.95977	257641	17.975
PRC-026	38	Female	Yes	No	No	Yes	Symptomatic	2	Mild/moderate	18	No	4	Heterologous	BBIBP-CorV	Yes	Yes	No	Yes	11	>6	12.5118	1.09732	50710.6	15.63	92681.9	16.5
PCR-028	71	Male	Yes	No	No	Yes	Symptomatic	1	Mild/moderate	not precise	No	3	Homologous	BNT162b2	No	Yes	No	No	22	>6	14.2047	1.15243	248.14	7.95501	3.2794e+06	21.645
PCR-030	21	Female	Yes	No	No	Yes	Symptomatic	1	Mild/moderate	13	No	3	Heterologous	BNT162b2	No	Yes	Yes	No	12	>6	6.37795	0.804681	3.86	1.9486	5.98	2.58015
PCR-031	22	Male	No	No	No	Yes	Symptomatic	2	Mild/moderate	13	Yes	3	Heterologous	BNT162b2	No	Yes	Yes	No	14	>6	10.2126	1.00914	294.07	8.20002	577716	19.14
PCR-032	23	Female	No	No	No	Yes	Symptomatic	1	Mild/moderate	38	Yes	4	Heterologous	BNT162b2	No	Yes	No	Yes	12	>6	12.0472	1.08089	6.34	2.66448	11	3.45943
PCR-035	23	Male	No	No	No	Yes	Symptomatic	3	Severe	not precise	No	3	Homologous	BNT162b2	No	Yes	No	No	not precise	>6	11.8583	1.07402	1.52738e+06	20.5426	2.29906e+06	21.1326
PCR-036	65	Female	Yes	No	No	No	criteria_not_met	criteria_not_met	criteria_not_met	criteria_not_met	No	5	Heterologous	BNT162b2	No	Yes	No	No	7	>6	10.7874	1.03292	9946.68	13.28	19282.4	14.235
PCR-037	24	Male	No	No	No	Yes	Symptomatic	3	Mild/moderate	14	No	4	Heterologous	BNT162b2	No	Yes	No	Yes	10	>6	13.0551	1.11578	50.91	5.66988	1.41268e+06	20.43
PCR-038	18	Female	Yes	Yes	Yes	Yes	Symptomatic	4	Mild/moderate	8	Yes	3	Homologous	BNT162b2	No	Yes	No	No	not precise	>6	5.87402	0.768935	6.17	2.62527	82.14	6.36001
PCR-039	18	Female	No	No	No	Yes	Symptomatic	2	Mild/moderate	32	Yes	3	Homologous	BNT162b2	No	Yes	No	No	14	>6	10.1417	1.00611	2.87	1.52105	2.64	1.40054
PCR-041	35	Male	No	No	No	Yes	Symptomatic	3	Mild/moderate	12	No	3	Heterologous	BBIBP-CorV	Yes	Yes	No	No	21	>6	10.811	1.03387	12.29	3.61941	1899.69	10.8915
PCR-043	20	Female	No	No	No	No	criteria_not_met	criteria_not_met	criteria_not_met	criteria_not_met	No	3	Heterologous	BBIBP-CorV	Yes	No	Yes	No	19	>6	6.81102	0.833212	5.41	2.43563	19824.5	14.275
PCR-044	32	Male	No	No	No	No	criteria_not_met	criteria_not_met	criteria_not_met	criteria_not_met	No	2	Heterologous	criteria_not_met	Yes	Yes	No	No	19	>6	4.91339	0.691381	1.24	0.31034	15.03	3.90977
PCR-045	41	Male	No	No	No	Yes	Symptomatic	1	Mild/moderate	30	Yes	4	Heterologous	BBIBP-CorV	Yes	Yes	No	Yes	15	>6	13.2283	1.12151	207.22	7.69502	7.12767e+06	22.765
PCR-046	46	Female	Yes	No	No	Yes	Symptomatic	1	Mild/moderate	not precise	No	4	Heterologous	BNT162b2	No	Yes	No	Yes	12	>6	14.1102	1.14953	0.002	-8.96578	0.06	-4.05889
PCR-047	27	Female	No	No	Yes	Yes	Symptomatic	1	Mild/moderate	30	No	3	Homologous	BNT162b2	No	Yes	No	No	21	>6	10.6693	1.02814	155.42	7.28003	3.41	1.76977
PCR- 049	37	Female	Yes	No	No	Yes	Symptomatic	2	Mild/moderate	22	Yes	4	Heterologous	BNT162b2	No	Yes	No	Yes	15	>6	8.75591	0.942301	0.17	-2.55639	531.9	9.05501
PCR-051	28	Male	No	No	No	Yes	Symptomatic	2	Mild/moderate	19	Yes	4	Homologous	BNT162b2	No	Yes	No	No	5	<6	13.937	1.14417	13216	13.69	33923.6	15.05
PCR-052	28	Male	Yes	No	No	Yes	Symptomatic	2	Mild/moderate	13	Yes	4	Heterologous	BNT162b2	No	Yes	No	No	0	<6	13.4488	1.12868	99334	16.6	1.70933e+06	20.705
PCR-053	19	Female	No	No	No	Yes	Symptomatic	3	Mild/moderate	19	No	3	Homologous	BNT162b2	No	Yes	No	No	5	<6	11.937	1.0769	5.64	2.4957	21.63	4.43496
PCR-055	36	Female	No	No	Yes	Yes	Symptomatic	3	Mild/moderate	1	Yes	3	Heterologous	BBIBP-CorV	Yes	Yes	No	No	19	>6	criteria_not_met	criteria_not_met	800199	19.61	1.37405e+06	20.39
