# Supplementary material for: SARS-CoV-2-specific humoral and cellular immunity assessment in Peruvian vaccinated population: a cross-sectional study
Source: PeerJ. 2025 Jul 15;13:e19651. doi: 10.7717/peerj.19651 (PMC12273700; doi:10.7717/peerj.19651)
Supplement: Supplemental Information 2 [file peerj-13-19651-s002.xls]

## Sheet: Sheet1
ITEM TO CHECK	IMPORTANCE	CHECKLIST
EXPERIMENTAL DESIGN
Definition of experimental and control groups	E	Line 127-139
Number within each group	E	Line 127-129
Assay carried out by core lab or investigator's lab?	D	investigator's lab
Acknowledgement of authors' contributions	D
SAMPLE
Description	E	Line 111-113
Volume/mass of sample processed	D	Line 111
Microdissection or macrodissection	E	Not Applicable
Processing procedure	E	Line 111-115
If frozen - how and how quickly?	E	Not frozen.
If fixed - with what, how quickly?	E	Not fixed.
Sample storage conditions and duration (especially for FFPE samples)	E	Line 112-113
NUCLEIC ACID EXTRACTION
Procedure and/or instrumentation	E	Line 141-154
Name of kit and details of any modifications	E	Line 142-143. Total RNA was extracted using the Trizol method.
Source of additional reagents used	D
Details of DNase or RNAse treatment	E	The RNA extraction protocol by the Trizol method did not use treatment with DNAses.
Contamination assessment (DNA or RNA)	E	Reverse transcription controls were performed in order to assess the existence of DNA in the RNA sample. For that purpose, RNA was processed as a normasample in a qPCR protocol standar.
Nucleic acid quantification	E	RNA concentration was assessed using spectrophotometry by measuring the absorbance at 260 nm UV light.
Instrument and method	E	BioTek Synergy LX (CA, United States); Spectrophotometry
Purity (A260/A280)	D	Average 1.85
Yield	D	The average RNA yield was approximately 69.41 ng/µl from 200 µl of blood.
RNA integrity method/instrument	E	RNA integrity was assessed through agarose gel electrophoresis.
RIN/RQI or Cq of 3' and 5' transcripts	E	Not applicable
Electrophoresis traces	D
Inhibition testing (Cq dilutions, spike or other)	E	Given the high quality of the starting RNA, the positive control confirms the absence of reverse transcription errors or PCR inhibitors.
REVERSE TRANSCRIPTION
Complete reaction conditions	E	Line 167-168. One-step RT-qPCR system from a commercial kit was used
Amount of RNA and reaction volume	E	Line 165-166 Reactions prepared according to the manufacturer’s instructions.
Priming oligonucleotide (if using GSP) and concentration	E	Not mentioned by the manufacturer
Reverse transcriptase and concentration	E	Not mentioned by the manufacturer
Temperature and time	E	Line 167-168
Manufacturer of reagents and catalogue numbers	D	SCRIPT Direct RT-qPCR ProbesMaster kit (Jena Bioscience, Jena, Germany)
Cqs with and without RT	D*
Storage conditions of cDNA	D
qPCR TARGET INFORMATION
If multiplex, efficiency and LOD of each assay.	E	Generally, it can be verified by repeated experiments.
Sequence accession number	E	Homo sapiens actin beta (ACTB), mRNA-> NM_001101.5 Homo sapiens C-X-C motif chemokine ligand 10 (CXCL10), transcript variant, mRNA ->NM_001565.4
Location of amplicon	D
Amplicon length	E	96-110bp
In silico specificity screen (BLAST, etc)	E	BLAST verified the specificity of primers
Pseudogenes, retropseudogenes or other homologs?	D
Sequence alignment	D
Secondary structure analysis of amplicon	D
Location of each primer by exon or intron (if applicable)	E	Not applicable
What splice variants are targeted?	E	Not applicable
qPCR OLIGONUCLEOTIDES
Primer sequences	E	Line 159-163
RTPrimerDB Identification Number	D
Probe sequences	D**	Line 160-161, 163
Location and identity of any modifications	E	Probe for CXCL10: 5' labeled with FAM and 3' labeled with BHQ-1. Probe for ACTB: 5' labeled with ROX and 3' labeled with BHQ-2.
Manufacturer of oligonucleotides	D
Purification method	D
qPCR PROTOCOL
Complete reaction conditions	E	Line 164-171. One-step RT-qPCR system from a commercial kit was used
Reaction volume and amount of cDNA/DNA	E	Reaction volume: 20ul; amount of RNA: 1ul.
Primer, (probe), Mg++ and dNTP concentrations	E	0.3uM Primers; 0.2uM Probe Mg++ and dNTP concentrations were not mentioned by the kit manufacturer.
Polymerase identity and concentration	E	Not mentioned by the kit manufacturer.
Buffer/kit identity and manufacturer	E	Not mentioned by the kit manufacturer.
Exact chemical constitution of the buffer	D	Not mentioned by the kit manufacturer.
Additives (SYBR Green I, DMSO, etc.)	E	Not applicable
Manufacturer of plates/tubes and catalog number	D
Complete thermocycling parameters	E	Line 166-171
Reaction setup (manual/robotic)	D
Manufacturer of qPCR instrument	E	Line 166-167
qPCR VALIDATION
Evidence of optimisation (from gradients)	D
Specificity (gel, sequence, melt, or digest)	E	Specificity was confirmed by gel.
For SYBR Green I, Cq of the NTC	E	Not applicable
Standard curves with slope and y-intercept	E	qPCR analysis was semi-quantitative
PCR efficiency calculated from slope	E	qPCR analysis was semi-quantitative
Confidence interval for PCR efficiency or standard error	D
r2 of standard curve	E	qPCR analysis was semi-quantitative
Linear dynamic range	E	Not applicable
Cq variation at lower limit	E	Not applicable
Confidence intervals throughout range	D
Evidence for limit of detection	E	Not applicable
If multiplex, efficiency and LOD of each assay.	E	Generally, it can be verified by repeated experiments.
DATA ANALYSIS
qPCR analysis program (source, version)	E	Line 171-173
Cq method determination	E	Line 171-172
Outlier identification and disposition	E	If the amplification curve and cq value are abnormal, it is necessary to explore the experimental conditions again.
Results of NTCs	E	No amplification was detected in NTCs
Justification of number and choice of reference genes	E	Line 157 Bibliographical reference
Description of normalisation method	E	Normalization to the reference gene ACTB using the ΔΔCq method.
Number and concordance of biological replicates	D
Number and stage (RT or qPCR) of technical replicates	E	RT-qPCR reactions were performed in duplicate.
Repeatability (intra-assay variation)	E	Mean standard deviation of duplicate: less than 0.80
Reproducibility (inter-assay variation, %CV)	D
Power analysis	D
Statistical methods for result significance	E	Line 175-184
Software (source, version)	E	FQD-48a V1.0.13 RC 20210730 LineGene4800
Cq or raw data submission using RDML	D
Table 1. MIQE checklist for authors, reviewers and editors. All essential information (E) must be submitted with the manuscript. Desirable
information (D) should be submitted if available. If using primers obtained from RTPrimerDB, information on qPCR target, oligonucleotides,
protocols and validation is available from that source.
*: Assessing the absence of DNA using a no RT assay is essential when first extracting RNA. Once the sample has been validated as
RDNA-free, inclusion of a no-RT control is desirable, but no longer essential.
**: Disclosure of the probe sequence is highly desirable and strongly encouraged. However, since not all commercial pre-designed assay
vendors provide this information, it cannot be an essential requirement. Use of such assays is advised against.
